# Supplementary material
Source: HighWire-hosted journal article supplement (https://gut.bmj.com/content/71/12/2439)
Supplement: inline-supplementary-material-9 [file inline-supplementary-material-9.pdf]

## Supplementary Figure 7 Microbiota dysbiosis/altered metabolites

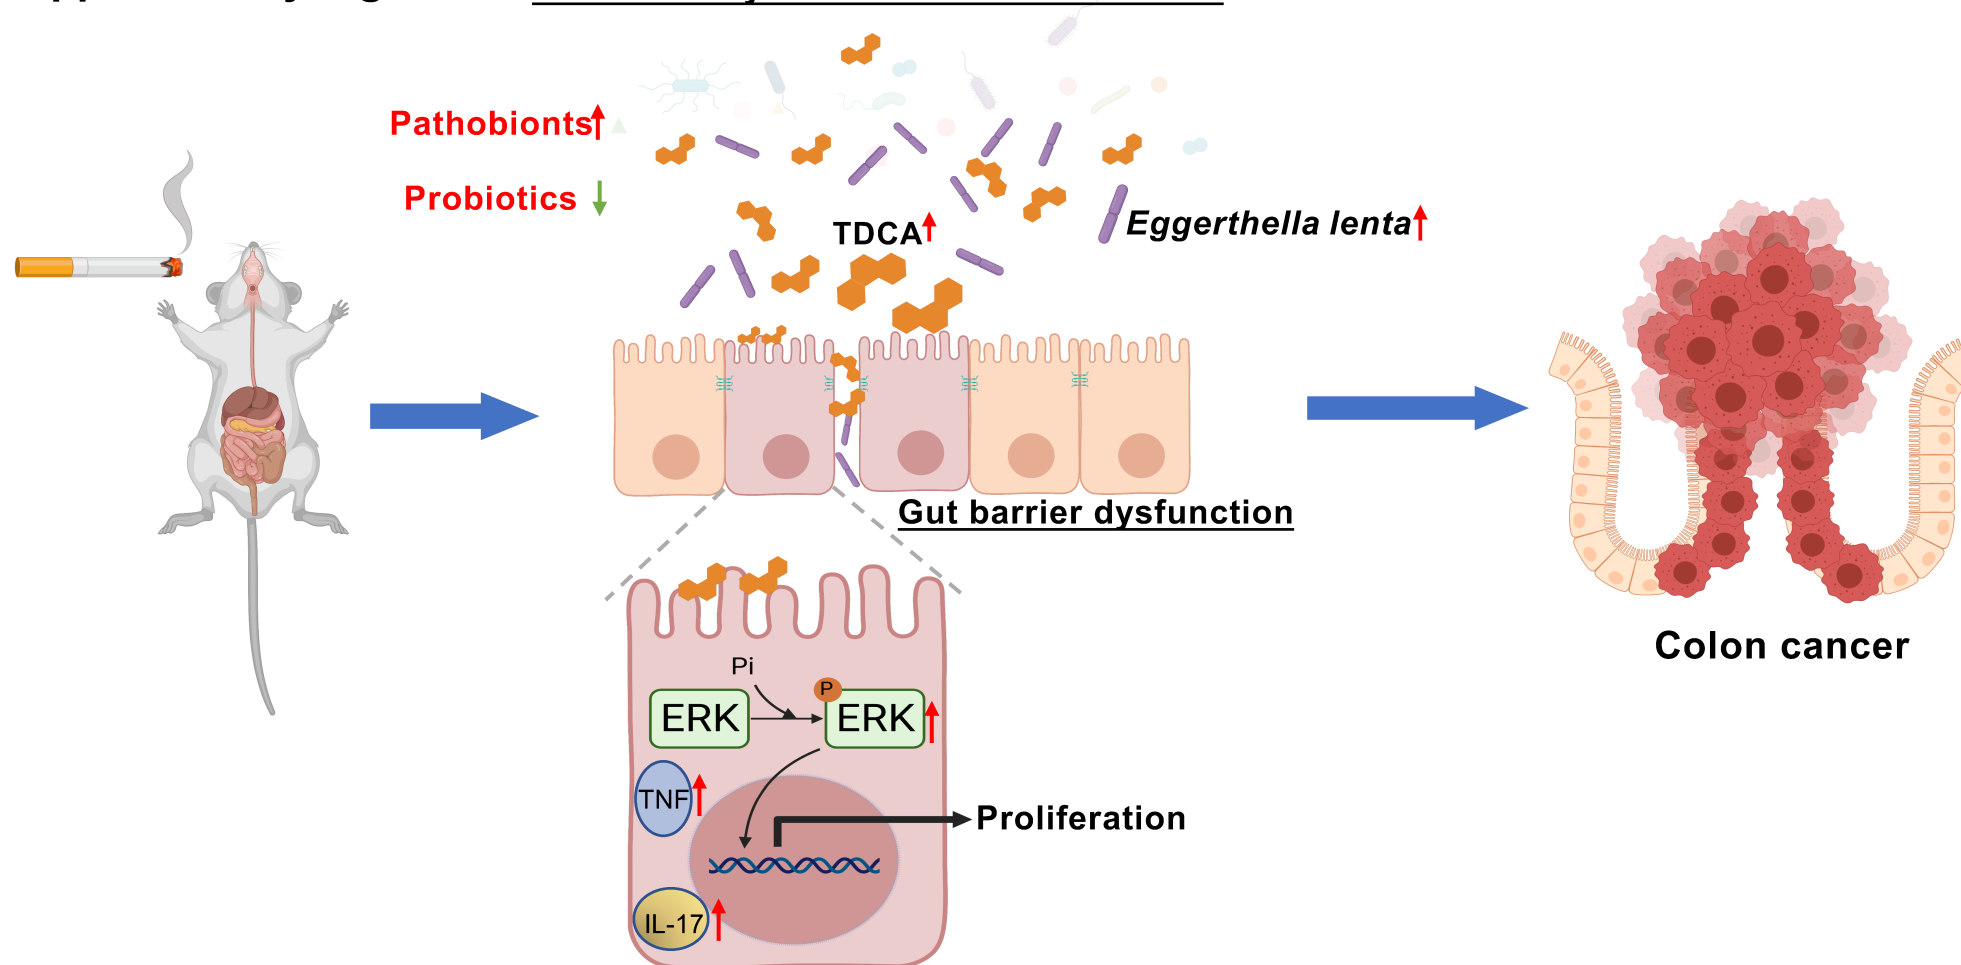

**Supplementary figure 7. Cigarette smoke promotes colon tumorigenesis by inducing gut microbiota dysbiosis and changed metabolites.** Cigarette smoke induced gut microbiota dysbiosis and altered metabolites (eg. induced taurodeoxycholic acid (TDCA)), which activated oncogenic MAPK/ERK signaling and pro-inflammatory (IL-17 and TNF) signalling pathways in colonic epithelium. Moreover, gut barrier dysfunction caused by gut microbiota dysbiosis might facilitate the TDCA to activate the MAPK/ERK signaling pathway. (Created with BioRender.com.)
